# Supplementary material
Source: PubMed Central journal article supplement (PMC7813514)
Supplement: mmc1.pdf [file mmc1.pdf]

We gratefully acknowledge the following Authors from the Originating laboratories responsible for obtaining the specimens, as well as the Submitting laboratories where the genome data were generated and shared via GISAID, on which this research is based.

All Submitters of data may be contacted directly via [www.gisaid.org](http://www.gisaid.org)

Authors are sorted alphabetically.

| Accession ID                                                                                                   | Originating Laboratory                                                                              | Submitting Laboratory                                                                               | Authors                                                                                                                                                                                                                                                                                           |
|----------------------------------------------------------------------------------------------------------------|-----------------------------------------------------------------------------------------------------|-----------------------------------------------------------------------------------------------------|---------------------------------------------------------------------------------------------------------------------------------------------------------------------------------------------------------------------------------------------------------------------------------------------------|
| EPI_ISL_660190, EPI_ISL_660614, EPI_ISL_660629                                                                 | NHLS-IALCH                                                                                          | KRISP, KZN Research Innovation and Sequencing Platform                                              | Giandhari J, Pillay S, Lessells R, Mdlalose K, York D, Khan S, Tegally H, Wilkinson E, de Oliveira T                                                                                                                                                                                              |
| EPI_ISL_678567                                                                                                 | Netcare                                                                                             | KRISP, KZN Research Innovation and Sequencing Platform                                              | Giandhari J, Pillay S, Lessells R, ChimukangaraB, Mdlalose K, York D, Khan S, Tegally H, Wilkinson E, de Oliveira T                                                                                                                                                                               |
| EPI_ISL_678570                                                                                                 | NHLS-IALCH                                                                                          | KRISP, KZN Research Innovation and Sequencing Platform                                              | Giandhari J, Pillay S, Lessells R, ChimukangaraB, Mdlalose K, York D, Khan S, Tegally H, Wilkinson E, de Oliveira T                                                                                                                                                                               |
| EPI_ISL_678571                                                                                                 | Netcare                                                                                             | KRISP, KZN Research Innovation and Sequencing Platform                                              | Giandhari J, Pillay S, Lessells R, ChimukangaraB, Mdlalose K, York D, Khan S, Tegally H, Wilkinson E, de Oliveira T                                                                                                                                                                               |
| EPI_ISL_678621, EPI_ISL_678625, EPI_ISL_678642, EPI_ISL_678643                                                 | NHLS-IALCH                                                                                          | KRISP, KZN Research Innovation and Sequencing Platform                                              | Giandhari J, Pillay S, Lessells R, ChimukangaraB, Mdlalose K, York D, Khan S, Tegally H, Wilkinson E, de Oliveira T                                                                                                                                                                               |
| EPI_ISL_696452, EPI_ISL_696499, EPI_ISL_696500                                                                 | Thembaletu CDC wc THC & NHLS/UCT                                                                    | KRISP, KZN Research Innovation and Sequencing Platform                                              | Arash Iranzadeh, Deelan Doolabh, Lynn Tyers, Bruna Galvao, Innocent Mudau, Marvin Hsiao, Kruger Marais, Jennifer Giandhari, Sureshnee Pillay, Houriyah Tegally, Emanuel James San, Tulio de Oliveira, Diana Hardie, Stephen Korsman, Carolyn Williamson                                           |
| EPI_ISL_696521                                                                                                 | Thembaletu CDC wc THC & NHLS/UCT                                                                    | KRISP, KZN Research Innovation and Sequencing Platform                                              | Arash Iranzadeh, Deelan Doolabh, Lynn Tyers, Bruna Galvao, Innocent Mudau, Marvin Hsiao, Kruger Marais, Jennifer Giandhari, Sureshnee Pillay, Houriyah Tegally, Emanuel James San, Tulio de Oliveira, Diana Hardie, Stephen Korsman, Carolyn Williamson                                           |
| EPI_ISL_700419                                                                                                 | Knysna Hospital wc KNY                                                                              | NHLS/UCT                                                                                            | Houriyah Tegally, Arash Iranzadeh, Deelan Doolabh, Lynn Tyers, Bruna Galvao, Innocent Mudau, Marvin Hsiao, Kruger Marais, Diana Hardie, Stephen Korsman, Carolyn Williamson                                                                                                                       |
| EPI_ISL_700427                                                                                                 | D'Almeida Clinic wc DAL                                                                             | NHLS/UCT                                                                                            | Houriyah Tegally, Arash Iranzadeh, Deelan Doolabh, Lynn Tyers, Bruna Galvao, Innocent Mudau, Marvin Hsiao, Kruger Marais, Diana Hardie, Stephen Korsman, Carolyn Williamson                                                                                                                       |
| EPI_ISL_700542                                                                                                 | Knysna CDC wc WLC                                                                                   | NHLS/UCT                                                                                            | Houriyah Tegally, Arash Iranzadeh, Deelan Doolabh, Lynn Tyers, Bruna Galvao, Innocent Mudau, Marvin Hsiao, Kruger Marais, Diana Hardie, Stephen Korsman, Carolyn Williamson                                                                                                                       |
| EPI_ISL_700590                                                                                                 | Conville CDC wc CVC                                                                                 | NHLS/UCT                                                                                            | Houriyah Tegally, Arash Iranzadeh, Deelan Doolabh, Lynn Tyers, Bruna Galvao, Innocent Mudau, Marvin Hsiao, Kruger Marais, Diana Hardie, Stephen Korsman, Carolyn Williamson                                                                                                                       |
| EPI_ISL_712070, EPI_ISL_712080                                                                                 | Port Elizabeth Provincial Hospital, National Health Laboratory Services, Eastern Cape, South Africa | National Institute for Communicable Diseases of the National Health Laboratory Service              | Mohale T, Ntuli N, Mahlangu B, Allam M, Ismail A, Bhiman JN                                                                                                                                                                                                                                       |
| EPI_ISL_718682                                                                                                 | Lighthouse Lab in Alderley Park                                                                     | Wellcome Sanger Institute for the COVID-19 Genomics UK (COG-UK) Consortium                          | Jacquelyn Wynn, Mairead Hyland, The Lighthouse Lab in Alderley Park and Alex Alderton, Roberto Amato, Sonia Goncalves, Ewan Harrison, David K. Jackson, Ian Johnston, Dominic Kwiatkowski, Cordelia Langford, John Sillitoe on behalf of the Wellcome Sanger Institute COVID-19 Surveillance Team |
| EPI_ISL_723468                                                                                                 | Port Elizabeth Provincial Hospital, National Health Laboratory Services, Eastern Cape, South Africa | National Institute for Communicable Diseases of the National Health Laboratory Service              | Mohale T, Ntuli N, Mahlangu B, Allam M, Ismail A, Bhiman JN                                                                                                                                                                                                                                       |
| EPI_ISL_736928, EPI_ISL_736929                                                                                 | NHLS-UCT                                                                                            | KRISP, KZN Research Innovation and Sequencing Platform                                              | Arash Iranzadeh, Deelan Doolabh, Lynn Tyers, Bruna Galvao, Innocent Mudau, Marvin Hsiao, Kruger Marais, Jennifer Giandhari, Sureshnee Pillay, Houriyah Tegally, Emanuel James San, Tulio de Oliveira, Diana Hardie, Stephen Korsman, Carolyn Williamson                                           |
| EPI_ISL_736930                                                                                                 | MDS                                                                                                 | KRISP, KZN Research Innovation and Sequencing Platform                                              | Giandhari J, Pillay S, Lessells R, ChimukangaraB, Mdlalose K, York D, Khan S, Tegally H, Wilkinson E, de Oliveira T                                                                                                                                                                               |
| EPI_ISL_736938                                                                                                 | NHLS-IALCH                                                                                          | KRISP, KZN Research Innovation and Sequencing Platform                                              | Giandhari J, Pillay S, Lessells R, ChimukangaraB, Mdlalose K, York D, Khan S, Tegally H, Wilkinson E, de Oliveira T                                                                                                                                                                               |
| EPI_ISL_736939                                                                                                 | NHLS-UCT                                                                                            | KRISP, KZN Research Innovation and Sequencing Platform                                              | Arash Iranzadeh, Deelan Doolabh, Lynn Tyers, Bruna Galvao, Innocent Mudau, Marvin Hsiao, Kruger Marais, Jennifer Giandhari, Sureshnee Pillay, Houriyah Tegally, Emanuel James San, Tulio de Oliveira, Diana Hardie, Stephen Korsman, Carolyn Williamson                                           |
| EPI_ISL_736958                                                                                                 | NHLS-IALCH                                                                                          | KRISP, KZN Research Innovation and Sequencing Platform                                              | Giandhari J, Pillay S, Lessells R, ChimukangaraB, Mdlalose K, York D, Khan S, Tegally H, Wilkinson E, de Oliveira T                                                                                                                                                                               |
| EPI_ISL_736968                                                                                                 | MDS                                                                                                 | KRISP, KZN Research Innovation and Sequencing Platform                                              | Giandhari J, Pillay S, Lessells R, ChimukangaraB, Mdlalose K, York D, Khan S, Tegally H, Wilkinson E, de Oliveira T                                                                                                                                                                               |
| EPI_ISL_736969                                                                                                 | NHLS-IALCH                                                                                          | KRISP, KZN Research Innovation and Sequencing Platform                                              | Giandhari J, Pillay S, Lessells R, ChimukangaraB, Mdlalose K, York D, Khan S, Tegally H, Wilkinson E, de Oliveira T                                                                                                                                                                               |
| EPI_ISL_745109                                                                                                 | Kraaifontein CHC wc KFP                                                                             | National Health Laboratory Service (NHLS), Tygerberg                                                | Susan Engelbrecht, Kayla Delaney, Bronwyn Kleinhans, Houriyah Tegally, Eduan Wilkindon, Gert van Zyl, Wolfgang Preiser, Tulio de Oliveira                                                                                                                                                         |
| EPI_ISL_745186                                                                                                 | Wallacedene Clinic wc WAL                                                                           | National Health Laboratory Service (NHLS), Tygerberg                                                | Susan Engelbrecht, Kayla Delaney, Bronwyn Kleinhans, Houriyah Tegally, Eduan Wilkindon, Gert van Zyl, Wolfgang Preiser, Tulio de Oliveira                                                                                                                                                         |
| EPI_ISL_761052                                                                                                 | Lighthouse Lab in Alderley Park                                                                     | Wellcome Sanger Institute for the COVID-19 Genomics UK (COG-UK) Consortium                          | Jacquelyn Wynn, Mairead Hyland, The Lighthouse Lab in Alderley Park and Alex Alderton, Roberto Amato, Sonia Goncalves, Ewan Harrison, David K. Jackson, Ian Johnston, Dominic Kwiatkowski, Cordelia Langford, John Sillitoe on behalf of the Wellcome Sanger Institute COVID-19 Surveillance Team |
| EPI_ISL_766245                                                                                                 | Respiratory Virus Unit, National Infection Service, Public Health England                           | COVID-19 Genomics UK (COG-UK) Consortium                                                            | PHE Covid Sequencing Team                                                                                                                                                                                                                                                                         |
| EPI_ISL_766709                                                                                                 | A05 Biomedicum                                                                                      | The Public Health Agency of Sweden                                                                  | Department of Microbiology, The Public Health Agency of Sweden                                                                                                                                                                                                                                    |
| EPI_ISL_768642                                                                                                 | Pathogen Genomics Center, National Institute of Infectious Diseases                                 | Pathogen Genomics Center, National Institute of Infectious Diseases                                 | Tsuyoshi Sekizuka, Kentaro Itokawa, Rina Tanaka, Masanori Hashino, Makoto Kuroda                                                                                                                                                                                                                  |
| EPI_ISL_768815                                                                                                 | Respiratory Virus Unit, National Infection Service, Public Health England                           | COVID-19 Genomics UK (COG-UK) Consortium                                                            | PHE Covid Sequencing Team                                                                                                                                                                                                                                                                         |
| EPI_ISL_768827, EPI_ISL_768828                                                                                 | CNR Virus des Infections Respiratoires - France SUD                                                 | CNR Virus des Infections Respiratoires - France SUD                                                 | Antonin Bal, Gregory Destras, Gwendolyne Burfin, Hadrien Règue, Quentin Semanas, Martine Valette, Bruno Lina, Laurence Josset                                                                                                                                                                     |
| EPI_ISL_770437, EPI_ISL_770439, EPI_ISL_770440, EPI_ISL_770441, EPI_ISL_770462, EPI_ISL_770467, EPI_ISL_770469 | Respiratory Virus Unit, National Infection Service, Public Health England                           | COVID-19 Genomics UK (COG-UK) Consortium                                                            | PHE Covid Sequencing Team                                                                                                                                                                                                                                                                         |
| EPI_ISL_770471, EPI_ISL_770472, EPI_ISL_770473, EPI_ISL_770474                                                 | National Health laboratory                                                                          | Botswana Institute for Technology Research and Innovation                                           | Kefentse Arnold Tumed, Madisa Mine, Dineo Emang Tshiamo. Gape Nyepetsi, Thongbotho Mphoyakgosi, Malebogo Kebabonye, Maitshwarelo Ignatius Matsheka                                                                                                                                                |
| EPI_ISL_770475                                                                                                 | National health Laboratory                                                                          | Botswana Institute for Technology Research and Innovation                                           | Kefentse Arnold Tumed, Madisa Mine, Dineo Emang Tshiamo. Gape Nyepetsi, Thongbotho Mphoyakgosi, Malebogo Kebabonye, Maitshwarelo Ignatius Matsheka                                                                                                                                                |
| EPI_ISL_775242, EPI_ISL_775245                                                                                 | Area of Virology, Serology and Virology Division (SAViD), New South Wales Health Pathology Randwick | Area of Virology, Serology and Virology Division (SAViD), New South Wales Health Pathology Randwick | Rawlinson, W., Bull, R., Deveson, I.                                                                                                                                                                                                                                                              |

We gratefully acknowledge the following Authors from the Originating laboratories responsible for obtaining the specimens, as well as the Submitting laboratories where the genome data were generated and shared via GISAID, on which this research is based.

All Submitters of data may be contacted directly via [www.gisaid.org](http://www.gisaid.org)

Authors are sorted alphabetically.

| Accession ID                                   | Originating Laboratory                                                                                                                                                                          | Submitting Laboratory                                                                                                                  | Authors                                                                                                                                                                                                                                                                                                                                                                                                                                                                  |
|------------------------------------------------|-------------------------------------------------------------------------------------------------------------------------------------------------------------------------------------------------|----------------------------------------------------------------------------------------------------------------------------------------|--------------------------------------------------------------------------------------------------------------------------------------------------------------------------------------------------------------------------------------------------------------------------------------------------------------------------------------------------------------------------------------------------------------------------------------------------------------------------|
| EPI_ISL_678572                                 | Netcare                                                                                                                                                                                         | KRISP, KZN Research Innovation and Sequencing Platform                                                                                 | Giandhari J, Pillay S, Lessells R, ChimukangaraB, Mdlalose K, York D, Khan S, Tegally H, Wilkinson E, de Oliveira T                                                                                                                                                                                                                                                                                                                                                      |
| EPI_ISL_712089, EPI_ISL_712096                 | Port Elizabeth Provincial Hospital, National Health Laboratory Services, Eastern Cape, South Africa                                                                                             | National Institute for Communicable Diseases of the National Health Laboratory Service                                                 | Mohale T, Ntuli N, Mahlangu B, Allam M, Ismail A, Bhiman JN                                                                                                                                                                                                                                                                                                                                                                                                              |
| EPI_ISL_736937, EPI_ISL_736961                 | Netcare                                                                                                                                                                                         | KRISP, KZN Research Innovation and Sequencing Platform                                                                                 | Giandhari J, Pillay S, Lessells R, ChimukangaraB, Mdlalose K, York D, Khan S, Tegally H, Wilkinson E, de Oliveira T                                                                                                                                                                                                                                                                                                                                                      |
| EPI_ISL_736983                                 | NHLS-UCT                                                                                                                                                                                        | KRISP, KZN Research Innovation and Sequencing Platform                                                                                 | Arash Iranzadeh, Deelan Doolabh, Lynn Tyers, Bruna Galvao, Innocent Mudau, Marvin Hsiao, Kruger Marais, Jennifer Giandhari, Sureshnee Pillay, Houriyah Tegally, Emanuel James San, Tulio de Oliveira, Diana Hardie, Stephen Korsman, Carolyn Williamson                                                                                                                                                                                                                  |
| EPI_ISL_737488, EPI_ISL_737642                 | Viollier AG                                                                                                                                                                                     | Department of Biosystems Science and Engineering, ETH Zürich                                                                           | Chaoran Chen, Sarah Nadeau, Catharine Aquino, Ivan Topolsky, Philipp Jablonski, Lara Fuhrmann, David Dreifuss, Katharina Jahn, Andreia Cabral de Gouvea, Maria Domenica Moccia, Simon Grüter, Timothy Sykes, Lennart Opitz, Griffin White, Laura Neff, Doris Popovic, Andrea Patrignani, Jay Tracy, Ralph Schlapbach, Christiane Beckmann, Maurice Redondo, Olivier Kobel, Christoph Noppen, Sophie Seidel, Noemie Santamaria de Souza, Niko Beerenwinkel, Tanja Stadler |
| EPI_ISL_738136                                 | Department of Virology and Immunology, University of Helsinki and Helsinki University Hospital, Huslab Finland                                                                                  | Department of Virology, Faculty of Medicine, University of Helsinki, Helsinki, Finland                                                 | Teemu Smura, Olli Vapalahti, Maija Lappalainen, Satu Kurkela                                                                                                                                                                                                                                                                                                                                                                                                             |
| EPI_ISL_761059, EPI_ISL_762362, EPI_ISL_762499 | Lighthouse Lab in Milton Keynes                                                                                                                                                                 | Wellcome Sanger Institute for the COVID-19 Genomics UK (COG-UK) Consortium                                                             | The Lighthouse Lab in Milton Keynes and Alex Alderton, Roberto Amato, Sonia Goncalves, Ewan Harrison, David K. Jackson, Ian Johnston, Dominic Kwiatkowski, Cordelia Langford, John Sillitoe on behalf of the Wellcome Sanger Institute COVID-19 Surveillance Team                                                                                                                                                                                                        |
| EPI_ISL_762992                                 | Division of Emerging Infectious Diseases, Bureau of Infectious Diseases Diagnosis Control, Korea Disease Control and Prevention Agency                                                          | Division of Emerging Infectious Diseases, Bureau of Infectious Diseases Diagnosis Control, Korea Disease Control and Prevention Agency | Ae Kyung Park, Il-Hwan Kim, Heui Man Kim, Jeong-Min Kim, Namjoo Lee, Chaeyoung Lee, Sang Hee Woo, Eun-Jin Kim                                                                                                                                                                                                                                                                                                                                                            |
| EPI_ISL_764278, EPI_ISL_764279                 | Virology Department, Royal Infirmary of Edinburgh, NHS Lothian / School of Biological Sciences, University of Edinburgh / Institute of Genetics and Molecular Medicine, University of Edinburgh | COVID-19 Genomics UK (COG-UK) Consortium                                                                                               | McHugh M, Dewar R, Rooke S, Gallagher M, Balcaza C, O'Toole Á, Scher E, Hill V, McCrone JT, Colquhoun R, Yu X, Jackson B, Rambaut A, Williams TC, Templeton K                                                                                                                                                                                                                                                                                                            |
| EPI_ISL_770438, EPI_ISL_770463                 | Respiratory Virus Unit, National Infection Service, Public Health England                                                                                                                       | COVID-19 Genomics UK (COG-UK) Consortium                                                                                               | PHE Covid Sequencing Team                                                                                                                                                                                                                                                                                                                                                                                                                                                |
| EPI_ISL_770470                                 | National Health laboratory                                                                                                                                                                      | Botswana Institute for Technology Research and Innovation                                                                              | Kefentse Arnold Tumedji, Madisa Mine, Dineo Emang Tshiamo. Gape Nyepetsi, Thongbotho Mphoyakgosi, Malebogo Kebabonye, Maitshwarelo Ignatius Matsheka                                                                                                                                                                                                                                                                                                                     |
